# Supplementary material for: Early Postnatal Genistein Administration Affects Mice Metabolism and Reproduction in a Sexually Dimorphic Way
Source: MDPI journal article supplement (doi:10.3390/metabo11070449), 2021-07-10
Supplement: s1 [file s1]

| POMC System         |            |            |            |            |             |        |
|---------------------|------------|------------|------------|------------|-------------|--------|
|                     | M-CON      | M-GEN      | F-CON      | F-GEN      | ANOVA 1 WAY |        |
|                     | (MEAN±SEM) | (MEAN±SEM) | (MEAN±SEM) | (MEAN±SEM) | F           | p      |
| <b>Cells in ARC</b> | 33.33±2.88 | 23.9±2.96  | 30.2±2.78  | 43.2±3.94  | 7.708       | 0.002  |
| <b>FA in ARC</b>    | 8.66±1.53  | 6.65±1.31  | 7.44±0.79  | 12.4±1.17  | 4.138       | 0.024  |
| <b>FA in DMH</b>    | 4.69±1.02  | 5.81±0.84  | 5.91±1.36  | 7.01±0.21  | 3.519       | 0.038  |
| <b>FA in PVN</b>    | 6.63±0.47  | 8.45±0.63  | 9.38±0.29  | 3.83±0.14  | 40.275      | <0.001 |
| DL                  | 1.49±0.37  | 2.04±0.48  | 2.08±0.13  | 0.76±0.11  | 4.587       | 0.021  |
| DM                  | 6.10±0.63  | 7.85±0.82  | 10.15±0.41 | 3.26±0.39  | 25.715      | <0.001 |
| VL                  | 2.22±0.53  | 3.42±0.71  | 4.28 ±0.37 | 1.38±0.38  | 6.170       | 0.008  |
| VM                  | 16.34±0.99 | 19.85±2.15 | 21.12±0.83 | 9.05±0.40  | 28.040      | <0.001 |

**Table S7: POMC system: quantitative data.** Quantitative data for the number of POMC cells in ARC and for POMC-ir structures (FA) in ARC, DM, and PVN for different groups in adult CD1 mice are reported in the corresponding columns (Mean±SEM). The results of the one-way ANOVA (F and p values) are reported at the right.
