# Supplementary material for: Early Postnatal Genistein Administration Affects Mice Metabolism and Reproduction in a Sexually Dimorphic Way
Source: MDPI journal article supplement (doi:10.3390/metabo11070449), 2021-07-10
Supplement: s1 [file s1]

**Daily feed efficiency (Body weight/Kcal)**

|              | <b>M-CON</b> | <b>M-GEN</b> | <b>F-CON</b> | <b>F-GEN</b> | <b>ANOVA 1 WAY</b> |          |
|--------------|--------------|--------------|--------------|--------------|--------------------|----------|
|              | (mean±SEM)   | (mean±SEM)   | (mean±SEM)   | (mean±SEM)   | F                  | <i>p</i> |
| <b>week1</b> | 1.23 ± 0.05  | 1.17 ± 0.06  | 1.19 ± 0.03  | 1.14 ± 0.04  | 0.245              | 0.864    |
| <b>week2</b> | 1.41 ± 0.05  | 1.44 ± 0.05  | 1.38 ± 0.02  | 1.39 ± 0.06  | 0.116              | 0.950    |
| <b>week3</b> | 1.40 ± 0.02  | 1.43 ± 0.03  | 1.24 ± 0.02  | 1.28 ± 0.04  | 4.064              | 0.021    |
| <b>week4</b> | 1.69 ± 0.03  | 1.78 ± 0.03  | 1.50 ± 0.04  | 1.59 ± 0.03  | 5.959              | 0.004    |
| <b>week5</b> | 1.91 ± 0.02  | 2.08 ± 0.04  | 1.70 ± 0.03  | 1.78 ± 0.04  | 10.467             | 0.001    |

**Table S6: Daily feed efficiency.** Daily feed efficiency (expressed as body weight gain/Kcal) during five weeks after weaning for different groups of CD1 mice is reported in the corresponding columns (Mean±SEM). The results of the one-way ANOVA (F and p values) are reported at the right.
