# Supplementary material for: Early Postnatal Genistein Administration Affects Mice Metabolism and Reproduction in a Sexually Dimorphic Way
Source: MDPI journal article supplement (doi:10.3390/metabo11070449), 2021-07-10
Supplement: s1 [file s1]

### Kisspeptin-ir (Fractional Area) in ARC

|              | M-CON      | M-GEN      | F-CON      | F-GEN      | ANOVA 1 WAY |        |
|--------------|------------|------------|------------|------------|-------------|--------|
|              | (MEAN±SEM) | (MEAN±SEM) | (MEAN±SEM) | (MEAN±SEM) | F           | P      |
| <b>PND12</b> | 1.4±0.008  | 7.0±0.02   | 5.4±0.42   | 1.8±0.44   | 53.247      | <0.001 |
| <b>PND22</b> | 1.9±0.179  | 2.4±0.32   | 12.0±0.89  | 8.7±0.42   | 64.367      | <0.001 |
| <b>PND30</b> | 6.1±0.40   | 4.5±0.36   | 21.1±0.43  | 25.9±0.46  | 664.655     | <0.001 |
| <b>PND60</b> | 9.2±1.33   | 8.9±0.31   | 25.2±1.53  | 12.9±0.51  | 58.391      | <0.001 |

### Kisspeptin positive cells in RP3V

|              | M-CON      | M-GEN      | F-CON      | F-GEN      | ANOVA 1 WAY |        |
|--------------|------------|------------|------------|------------|-------------|--------|
|              | (MEAN±SEM) | (MEAN±SEM) | (MEAN±SEM) | (MEAN±SEM) | F           | p      |
| <b>PND12</b> | 1.8±0.12   | 2.3±0.20   | 2.6±0.19   | 4±0.29     | 19.146      | <0.001 |
| <b>PND22</b> | 2±0.20     | 3.5±0.18   | 7.5±0.46   | 10.5±0.69  | 73.769      | <0.001 |
| <b>PND30</b> | 1.67±0.10  | 2.8±0.23   | 12.9±1.57  | 20.2±1.29  | 79.593      | <0.001 |
| <b>PND60</b> | 1.6±0.30   | 2.2±0.42   | 31.7±2.23  | 19.6±0.93  | 149.712     | <0.001 |

### Kisspeptin-ir fibers (FA) in PVN

|              | M-CON      | M-GEN      | F-CON      | F-GEN      | ANOVA 1 WAY |        |
|--------------|------------|------------|------------|------------|-------------|--------|
|              | (MEAN±SEM) | (MEAN±SEM) | (MEAN±SEM) | (MEAN±SEM) | F           | p      |
| <b>PND12</b> | 1.4±0.17   | 1.6±0.27   | 0.9±0.29   | 1.1±0.21   | 3.468       | 0.059  |
| <b>PND22</b> | 1.3±0.15   | 1.2±0.19   | 3.2±0.18   | 3.8±0.28   | 40.045      | <0.001 |
| <b>PND30</b> | 1.1±0.14   | 1.1±0.23   | 3.7±0.19   | 6.7±0.31   | 134.996     | <0.001 |
| <b>PND60</b> | 0.9±0.13   | 1.2±0.20   | 6.6±0.38   | 3.5±0.49   | 73.344      | <0.001 |

### Kisspeptin-ir fibres (FA) within subdivisions of PVN

|              |    | M-CON      | M-GEN      | F-CON      | F-GEN      | ANOVA 1 WAY |        |
|--------------|----|------------|------------|------------|------------|-------------|--------|
|              |    | (MEAN±SEM) | (MEAN±SEM) | (MEAN±SEM) | (MEAN±SEM) | F           | p      |
| <b>PND12</b> | DL | 1.2±0.27   | 1.1±0.20   | 0.4±0.12   | 0.3±0.09   | 6.31        | 0.011  |
|              | DM | 1.4±0.13   | 1.6±0.20   | 0.9±0.26   | 1.2±0.16   | 1.78        | 0.214  |
|              | VL | 1.1±0.21   | 1.1±0.12   | 0.7±0.16   | 0.5±0.10   | 3.731       | 0.049  |
|              | VM | 1.6±0.10   | 2.1±0.15   | 1.3±0.47   | 1.5±0.09   | 1.411       | 0.296  |
| <b>PND22</b> | DL | 0.8±0.16   | 0.9±0.21   | 1.6±0.20   | 1.9±0.25   | 7.132       | 0.003  |
|              | DM | 0.9±0.14   | 0.9±0.12   | 3.2±0.08   | 3.2±0.27   | 51.358      | <0.001 |
|              | VL | 1.0±0.13   | 1.1±0.26   | 1.7±0.25   | 2.1±0.26   | 4.737       | 0.014  |
|              | VM | 2.1±0.26   | 1.7±0.21   | 4.7±0.33   | 6.0±0.50   | 33.322      | <0.001 |
| <b>PND30</b> | DL | 0.5±0.13   | 0.5±0.18   | 1.4±0.14   | 2.6±0.17   | 39.361      | <0.001 |
|              | DM | 0.8±0.23   | 0.7±0.09   | 4.0±0.12   | 6.6±0.43   | 117.27      | <0.001 |
|              | VL | 0.4±0.07   | 0.7±0.23   | 1.8±0.33   | 2.5±0.71   | 5.385       | 0.014  |
|              | VM | 1.7±0.12   | 1.9±0.42   | 5.7±0.46   | 10.9±0.36  | 142.079     | <0.001 |
| <b>PND60</b> | DL | 0.3±0.09   | 0.4±0.08   | 1.2±0.32   | 0.5±0.11   | 9.864       | 0.007  |
|              | DM | 0.6±0.07   | 1.1±0.24   | 5.2±0.71   | 4.1±0.43   | 92.729      | <0.001 |
|              | VL | 0.4±0.16   | 0.7±0.07   | 1.6±0.17   | 1.1±0.15   | 31.008      | <0.001 |
|              | VM | 1.9±0.34   | 2.0±0.37   | 12.5±0.76  | 6.0±1.03   | 135.474     | <0.001 |

**Table S3: Kisspeptin system: quantitative data.** Quantitative data for kisspeptin-ir (FA) in ARC, for number of the kisspeptin cells in RP3V, and FA within PVN [divided in DorsoLateral (DL), DorsoMedial (DM), VentroLateral (VL), and VentroMedial (VM)], are reported in the corresponding columns (Mean±SEM) for different groups and different age of CD1 mice. The results of the one-way ANOVA (F and p values) are reported at the right.
