# Supplementary material for: Early Postnatal Genistein Administration Affects Mice Metabolism and Reproduction in a Sexually Dimorphic Way
Source: MDPI journal article supplement (doi:10.3390/metabo11070449), 2021-07-10
Supplement: s1 [file s1]

| Daily food eaten |                     |                     |                     |                     |             |          |
|------------------|---------------------|---------------------|---------------------|---------------------|-------------|----------|
|                  | M-CON<br>(mean±SEM) | M-GEN<br>(mean±SEM) | F-CON<br>(mean±SEM) | F-GEN<br>(mean±SEM) | ANOVA 1 WAY |          |
|                  |                     |                     |                     |                     | F           | <i>p</i> |
| <b>week1</b>     | 3.13±0.24           | 3.25±0.34           | 2.99±0.23           | 3.11±0.34           | 0.227       | 0.877    |
| <b>week2</b>     | 5.03±0.26           | 4.97±0.09           | 4.16±0.16           | 4.06±0.30           | 5.523       | 0.006    |
| <b>week3</b>     | 6.26±0.19           | 6.26±0.46           | 5.63±0.32           | 5.49±0.38           | 1.354       | 0.285    |
| <b>week4</b>     | 5.80±0.20           | 5.50±0.05           | 4.75±0.23           | 4.72±0.08           | 11.832      | 0.001    |
| <b>week5</b>     | 5.50±0.32           | 5.25±0.24           | 4.55±0.32           | 4.56±0.21           | 3.095       | 0.050    |

**Table S5: Daily food eaten.** Daily food eaten (expressed in grams) during five weeks after weaning for different groups of CD1 mice is reported in the corresponding columns (Mean±SEM). The results of the one-way ANOVA (F and p values) are reported at the right.
