# Supplementary material for: Early Postnatal Genistein Administration Affects Mice Metabolism and Reproduction in a Sexually Dimorphic Way
Source: MDPI journal article supplement (doi:10.3390/metabo11070449), 2021-07-10
Supplement: s1 [file s1]

| Body weight gain (gr) |                     |                     |                     |                     |             |       |
|-----------------------|---------------------|---------------------|---------------------|---------------------|-------------|-------|
|                       | M-CON<br>(MEAN±SEM) | M-GEN<br>(MEAN±SEM) | F-CON<br>(MEAN±SEM) | F-GEN<br>(MEAN±SEM) | ANOVA 1 WAY |       |
|                       |                     |                     |                     |                     | F           | p     |
| <b>PND1</b>           | 1.83 ± 0.08         | 1.81 ± 0.05         | 1.71 ± 0.06         | 1.67 ± 0.07         | 0.695       | 0.566 |
| <b>PND8</b>           | 4.88 ± 0.26         | 5.41 ± 0.16         | 4.28 ± 0.16         | 5.11 ± 0.16         | 3.084       | 0.051 |
| <b>PND12</b>          | 6.63 ± 0.40         | 6.83 ± 0.30         | 6.13 ± 0.21         | 7.08 ± 0.17         | 0.974       | 0.424 |
| <b>PND18</b>          | 9.10 ± 0.59         | 9.62 ± 0.50         | 8.27 ± 0.26         | 9.60 ± 0.33         | 1.015       | 0.407 |
| <b>PND22</b>          | 13.18 ± 0.62        | 13.55 ± 0.80        | 12.11 ± 0.36        | 13.25 ± 0.43        | 0.579       | 0.635 |
| <b>PND30</b>          | 26.08 ± 0.70        | 26.20 ± 0.69        | 20.32 ± 0.38        | 21.91 ± 0.10        | 15.614      | 0.001 |
| <b>PND40</b>          | 32.05 ± 0.60        | 32.15 ± 0.55        | 23.67 ± 0.61        | 26.47 ± 0.24        | 33.589      | 0.001 |
| <b>PND50</b>          | 34.32 ± 0.41        | 35.80 ± 0.71        | 25.13 ± 0.55        | 28.27 ± 0.35        | 45.681      | 0.001 |
| <b>PND60</b>          | 36.30 ± 0.65        | 37.50 ± 0.58        | 25.7 ± 0.77         | 29.93 ± 0.65        | 34.64       | 0.001 |

**Table S4: Body weight gain.** Body weight gain (expressed in grams) measured during the development for different groups of CD1 mice, is reported in the columns (Mean±SEM). The results of the one-way ANOVA (F and p values) are reported at the right.
