# Supplementary material for: Early Postnatal Genistein Administration Affects Mice Metabolism and Reproduction in a Sexually Dimorphic Way
Source: MDPI journal article supplement (doi:10.3390/metabo11070449), 2021-07-10
Supplement: s1 [file s1]

**A) Number of POMC positive cells in ARC during postnatal development**

|              | M-CON      | M-GEN      | F-CON      | F-GEN      | ANOVA 1 WAY |       |
|--------------|------------|------------|------------|------------|-------------|-------|
|              | (MEAN±SEM) | (MEAN±SEM) | (MEAN±SEM) | (MEAN±SEM) | F           | p     |
| <b>PND12</b> | 56.30±3.72 | 50.5±1.51  | 46.6±2.02  | 51.2±2.77  | 13.957      | 0.002 |
| <b>PND22</b> | 40.90±2.44 | 51.22±3.68 | 41.9±5.34  | 39.6±4.32  | 1.617       | 0.242 |
| <b>PND30</b> | 29.50±2.32 | 33.0±1.68  | 36.4±1.19  | 38.0±2.61  | 2.212       | 0.132 |
| <b>PDN60</b> | 33.33±2.88 | 23.9±2.96  | 30.2±2.78  | 43.2±3.94  | 7.708       | 0.002 |

**B) Number of Orexin positive cells in LH during postnatal development**

|              | M-CON       | M-GEN       | F-CON       | F-GEN        | ANOVA 1 WAY |       |
|--------------|-------------|-------------|-------------|--------------|-------------|-------|
|              | (MEAN±SEM)  | (MEAN±SEM)  | (MEAN±SEM)  | (MEAN±SEM)   | F           | p     |
| <b>PND12</b> | 190.30±8.27 | 160.6±5.48  | 177.7±10.89 | 182.8±10.57  | 2.346       | 0.111 |
| <b>PND22</b> | 225.7±12.06 | 191.9±6.57  | 216.1±7.24  | 179.1±9.85   | 5.472       | 0.008 |
| <b>PND30</b> | 316.9±11.72 | 210.3±16.94 | 288.8±20.62 | 343.9±27.31  | 8.346       | 0.001 |
| <b>PND60</b> | 313.7±18.21 | 253.4±13.52 | 189.9±19.29 | 260.70±10.90 | 8.904       | 0.001 |

**Table S9: Postnatal changes in the average number of POMC and Orexin positive cells in ARC (A) and LH (B).**
