# Supplementary material for: Early Postnatal Genistein Administration Affects Mice Metabolism and Reproduction in a Sexually Dimorphic Way
Source: MDPI journal article supplement (doi:10.3390/metabo11070449), 2021-07-10
Supplement: s1 [file s1]

| <b>Fecal Testosterone (ng/gr)</b> |                            |                            |
|-----------------------------------|----------------------------|----------------------------|
|                                   | <b>M-CON</b><br>(MEAN±SEM) | <b>M-GEN</b><br>(MEAN±SEM) |
| <b>PND30</b>                      | 0.62±0.07                  | 0.59±0.10                  |
| <b>PND60</b>                      | 1.12±0.09                  | 0.5±0.16                   |

**Table S2: Fecal testosterone.** The concentration of fecal testosterone (expressed as ng/gr) at PND30 and PND60 for different groups of CD1 male mice is reported in the columns (Mean±SEM).
