# Supplementary material for: Early Postnatal Genistein Administration Affects Mice Metabolism and Reproduction in a Sexually Dimorphic Way
Source: MDPI journal article supplement (doi:10.3390/metabo11070449), 2021-07-10
Supplement: s1 [file s1]

| <b>Gland length</b> | <b>F-CON</b> | <b>F-GEN</b> |
|---------------------|--------------|--------------|
| <b>PND22</b>        | 3.90±0.21    | 3.03±0.39    |
| <b>PND30</b>        | 12.93±0.86   | 10.55±0.19   |
| <b>PND60</b>        | 22.03±0.98   | 21.65±2.51   |
| <b>TEB</b>          |              |              |
| <b>PND22</b>        | 10.50±4.5    | 13.00±1.80   |
| <b>PND30</b>        | 11.67±1.33   | 13.50±0.65   |
| <b>PND60</b>        | NA           | NA           |

**Table S1: Mammary gland length and terminal end buds (TEB) numbers.** Mammary gland length (mm) and TEB numbers in virgin female mice CD1 control (F-CON) or treated with Genistein (F-GEN) at PND22, PND30 and PND60 are reported in the corresponding columns (Mean±SEM).
