# Supplementary material for: Early Postnatal Genistein Administration Affects Mice Metabolism and Reproduction in a Sexually Dimorphic Way
Source: MDPI journal article supplement (doi:10.3390/metabo11070449), 2021-07-10
Supplement: s1 [file s1]

### A) Orexin positive cells in whole LH and in the selected four levels

|                       | M-CON<br>(MEAN±SEM) | M-GEN<br>(MEAN±SEM) | F-CON<br>(MEAN±SEM) | F-GEN<br>(MEAN±SEM) | ANOVA 1 WAY |       |
|-----------------------|---------------------|---------------------|---------------------|---------------------|-------------|-------|
|                       |                     |                     |                     |                     | F           | p     |
| <b>Average number</b> | 313.7±18.21         | 253.4±14.70         | 189.9±19.29         | 260.70±10.90        | 8.904       | 0.001 |
| Level 1               | 293.2±15.59         | 218.17±13.52        | 146.4±16.59         | 176.17±13.73        | 14.907      | 0.001 |
| Level 2               | 402.8±23.14         | 339.33±16.69        | 189.8±21.20         | 278.17±14.01        | 19.866      | 0.001 |
| Level 3               | 322.4±27.12         | 282.00±22.65        | 232.0±28.60         | 368.30±29.40        | 3.98        | 0.024 |
| Level 4               | 236.6±14.93         | 174.17±27.11        | 191.4±21.67         | 220.17±19.42        | 1.652       | 0.213 |

### B) Orexin-ir (Fractional Area) in PVN

|                  | M-CON<br>(MEAN±SEM) | M-GEN<br>(MEAN±SEM) | F-CON<br>(MEAN±SEM) | F-GEN<br>(MEAN±SEM) | ANOVA 1 WAY |       |
|------------------|---------------------|---------------------|---------------------|---------------------|-------------|-------|
|                  |                     |                     |                     |                     | F           | p     |
| <b>FA in PVN</b> | 4.64±0.35           | 3.29±0.30           | 3.84±0.46           | 5.18±0.18           | 6.390       | 0.008 |
| DL               | 4.35±0.54           | 3.66±0.27           | 3.60±0.38           | 4.32±0.56           | 0.801       | 0.517 |
| DM               | 5.99±0.80           | 4.01±0.67           | 3.87±0.57           | 5.49±0.48           | 2.705       | 0.092 |
| VL               | 4.06±0.22           | 2.26±0.71           | 3.78 ±0.62          | 4.71±0.82           | 2.649       | 0.096 |
| VM               | 4.02±0.19           | 2.61±0.13           | 4.30±0.50           | 5.65±0.68           | 8.127       | 0.003 |

**Table S8: Orexin system in adult mice (PND60):**

**A)** The first row shows the average number of orexin-positive cells in the LH. The following rows show the mean amount of positive cells in the selected four levels of LH.

**B)** Quantitative data for Orexin-ir fibers (FA) within PVN [divided in DorsoLateral (DL), DorsoMedial (DM), VentroLateral (VL), and VentroMedial (VM)] are reported in the corresponding columns (Mean±SEM) for different groups of adult CD1 mice. The results of the one-way ANOVA (F and p values) are reported at the right.
