# Supplementary material for: Early Postnatal Genistein Administration Affects Mice Metabolism and Reproduction in a Sexually Dimorphic Way
Source: Metabolites. 2021 Jul 10;11(7):449. doi: 10.3390/metabo11070449 (PMC8303179; doi:10.3390/metabo11070449)
Supplement: Supplementary file 1 [file metabolites-11-00449-s001.zip]

Archive with 9 entries (9 files):
- TableS1-Gland length.pdf
- TableS2-Fecal Testosterone.pdf
- TableS3-Kisspeptin.pdf
- TableS4-Body weight gain.pdf
- TableS5-Daily food eaten.pdf
- TableS6-Daily feed efficiency.pdf
- TableS7-POMC System.pdf
- TableS8- POMC-Orexin develop.pdf
- TableS9-Orexin positive cells in four levels of LH.pdf
